# Supplementary material
Source: publisher figshare collection journal article supplement (https://diabetesjournals.figshare.com/ndownloader/files/22821191)

**Supplementary Table 1-Pearson’s correlation coefficient of fasting serum fructose concentration with risk factors**

| Variables | r | P Value |
| --- | --- | --- |
| Age | 0.046 | 0.16 |
| Sex (male=1, female=0) | 0.17 | <0.0001 |
| Current smoker (yes=1, no=0) | -0.066 | 0.043 |
| Current drinker (yes=1, no=0) | 0.084 | 0.0099 |
| BMI, kg/m2 | 0.057 | 0.071 |
| Fasting plasma glucose, mmol/L | 0.27 | <0.0001 |
| 2h post-load glucose, mmol/L | 0.14 | <0.0001 |
| HbA1c, % | 0.091 | 0.0042 |
| SBP, mmHg | 0.017 | 0.59 |
| DBP, mmHg | 0.058 | 0.068 |
| TC, mmol/L | 0.046 | 0.15 |
| TG, mmol/L | 0.090 | 0.0044 |
| LDL-C, mmol/L | 0.053 | 0.093 |
| HDL-C, mmol/L | -0.024 | 0.44 |
| ALT, U/L | 0.077 | 0.018 |
| AST, U/L | 0.093 | 0.0041 |
| SSBs consumption, servings/week | -0.018 | 0.59 |
| Uric acid, µmol/L | 0.13 | 0.0001 |
| eGFR, ml/min/1.73m2 | -0.050 | 0.13 |

r, correlation coefficient.

**Supplementary Table 2-HR of baseline fasting serum fructose levels on risk of incident diabetes after excluding frequent SSB consumption**

|  | Fasting serum fructose levels | | | | P for Trend | HR (95% CI) 1-SD increase |
| --- | --- | --- | --- | --- | --- | --- |
| Q1 | Q2 | Q3 | Q4 |
| HR (95% CI) |  |  |  |  |  |  |
| Age- and sex- adjusted model | Ref. | 1.37 (0.86-2.18) | 1.48 (0.93-2.35) | 1.72 (1.11-2.67) | 0.0026 | 1.38 (1.12-1.69) |
| Multivariate model 1 | Ref. | 1.43 (0.88-2.34) | 1.49 (0.92-2.42) | 1.79 (1.13-2.84) | 0.0022 | 1.40 (1.13-1.74) |
| Multivariate model 2 | Ref. | 1.25 (0.75-2.10) | 1.54 (0.93-2.55) | 1.66 (1.02-2.70) | 0.0086 | 1.34 (1.08-1.68) |
| Multivariate model 3 | Ref. | 1.20 (0.72-2.02) | 1.46 (0.88-2.41) | 1.57 (0.96-2.57) | 0.015 | 1.32 (1.06-1.65) |
| Multivariate model 4 | Ref. | 1.14 (0.68-1.92) | 1.38 (0.83-2.28) | 1.50 (0.92-2.44) | 0.012 | 1.30 (1.04-1.63) |
| Multivariate model 5 | Ref. | 1.14 (0.68-1.91) | 1.38 (0.83-2.28) | 1.49 (0.91-2.43) | 0.023 | 1.30 (1.04-1.62) |

Multivariate model 1 adjusted for age, sex, body mass index, family history of diabetes, smoking and drinking status;

Multivariate model 2 adjusted for age, sex, body mass index, family history of diabetes, smoking and drinking status, systolic blood pressure, diastolic blood pressure, total cholesterol, triglycerides, LDL-C, HDL-C, ALT, AST;

Multivariate model 3 adjusted for age, sex, body mass index, family history of diabetes, smoking and drinking status, systolic blood pressure, diastolic blood pressure, total cholesterol, triglycerides, LDL-C, HDL-C, ALT, AST, basal glucose;

Multivariate model 4 adjusted for age, sex, body mass index, family history of diabetes, smoking and drinking status, systolic blood pressure, diastolic blood pressure, total cholesterol, triglycerides, LDL-C, HDL-C, ALT, AST, basal glucose, uric acid;

Multivariate model 5 adjusted for age, sex, body mass index, family history of diabetes, smoking and drinking status, systolic blood pressure, diastolic blood pressure, total cholesterol, triglycerides, LDL-C, HDL-C, ALT, AST, basal glucose, uric acid, eGFR.

**Supplementary Table 3-Prediction of incident diabetes with clinical model based on fasting serum fructose or not**

| Models | HR (95% CI) for 1-SD increase | log-likelihood ratio | c-statistic |
| --- | --- | --- | --- |
| Clinical model based on age, sex, BMI, family history of diabetes, smoke, drink | 1.31 (1.10-1.56) | 9 | 0.57 |
| + Fasting Fructose level | 1.44 (1.22-1.72) | 18 | 0.61 |
| + Fasting Glucose Level | 1.51 (1.26-1.80) | 21 | 0.62 |
| + 2h-post Glucose Level | 1.58 (1.33-1.88) | 27 | 0.62 |
| + HbA1c | 1.33 (1.12-1.59) | 10 | 0.58 |

Higher numbers for log-likelihood ratio indicate better model fit.

**Supplementary Table 4-Characteristics of subjects eligible for the acute intervention study**

| Variables | Values (n=11) |
| --- | --- |
| Age, yr | 25 ± 2 |
| Male, n(%) | 6 (66%) |
| Body mass index, kg/m2 | 22.1 ± 3.5 |
| Fasting plasma glucose, mmol/L | 4.5 ± 0.9 |
| Systolic blood pressure, mmHg | 127 ± 17 |
| Diastolic blood pressure, mmHg | 80 ± 10 |
| Heart rate, beats/min | 75 ± 8 |

Values are presented as mean ± SD, or n (%).

**Supplementary Figure 1. Serum fructose concentrations after oral SSB challenge test. Data are mean±SD.**


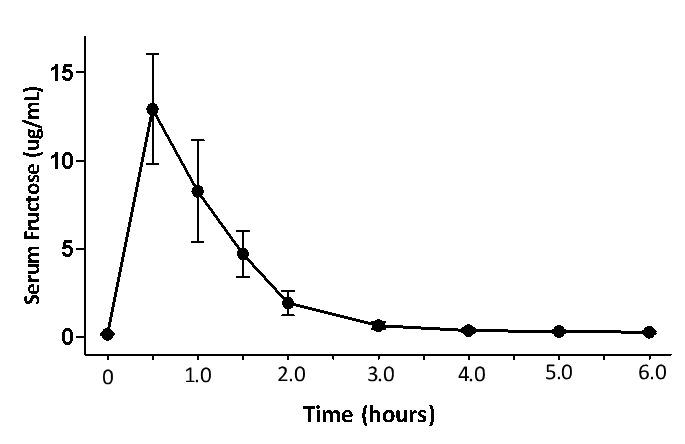

Supplement: Supplementary file 1 [file 22821191]
